# Supplementary material for: Estimating the phylogeny of geoemydid turtles (Cryptodira) from landmark data: an assessment of different methods
Source: PeerJ. 2019 Aug 22;7:e7476. doi: 10.7717/peerj.7476 (PMC6708579; doi:10.7717/peerj.7476)
Supplement: Supplemental Information 2 — Detail of how many carapaces and plastra were sampled per species to build the datasets used in the phylogenetic analyses. [file peerj-07-7476-s002.xlsx]

## Sheet: species_counts
Species	Carapace	Plastron
Batagur baska	1	2
Batagur borneoensis	0	1
Batagur dhongoka	3	3
Batagur kachuga	1	1
Cuora amboinensis	5	3
Cuora aurocapitata	1	1
Cuora flavomarginata	2	2
Cuora galbinifrons	1	0
Cuora mccordi	1	2
Cuora pani	1	0
Cuora picturata	0	1
Cyclemys dentata	1	3
Cyclemys oldhamii	2	1
Geoemyda spengleri	1	1
Hardella thurjii	3	3
Heosemys annandalii	3	2
Heosemys grandis	2	3
Heosemys spinosa	2	2
Leucocephalon yuwonoi	3	1
Malaclemys terrapin	4	3
Malayemys subtrijuga	2	2
Mauremys annamensis	1	1
Mauremys caspica	1	2
Mauremys japonica	2	2
Mauremys leprosa	1	1
Mauremys nigricans	4	4
Mauremys reevesii	3	3
Mauremys rivulata	1	1
Mauremys sinensis	1	1
Melanochelys trijuga	4	3
Morenia ocellata	1	1
Morenia petersi	3	2
Notochelys platynota	6	4
Orlitia borneensis	3	3
Pangshura smithii	2	2
Pangshura tecta	2	2
Pangshura tentoria	5	4
Rhinoclemmys annulata	2	2
Rhinoclemmys areolata	2	2
Rhinoclemmys diademata	0	1
Rhinoclemmys funerea	3	3
Rhinoclemmys melanosterna	1	1
Rhinoclemmys nasuta	2	2
Rhinoclemmys pulcherrima	3	3
Rhinoclemmys punctularia	2	2
Sacalia bealei	2	2
Sacalia quadriocellata	0	1
Siebenrockiella crassicollis	7	6
